# Supplementary material
Source: PubMed Central journal article supplement (PMC3457467)
Supplement: AEM.01621-12_zam999103717so1.pdf [file AEM.01621-12_zam999103717so1.pdf]

Table S1. List of oligonucleotide primers.

| №   | sequence                                                            |
|-----|---------------------------------------------------------------------|
| #1  | 5'-GGCATCGARTACTCGATCAAYAAYGC-3'                                    |
| #2  | 5'-CGAACCGCCCGARTCGCC-3'                                            |
| #3  | 5'-CGCTCGGCTTCATTCCATCGATC-3'                                       |
| #4  | 5'-TCAGCCGGTGACCAGGCTCAGGCC-3'                                      |
| #5  | 5'-GAAGCAACGGCCACTGTCGCTCAC-3'                                      |
| #6  | 5'-GGGCTACACCGGTGCGCGATC-3'                                         |
| #7  | 5'-GAGTTTTTCGGTCTGCAGGT-3'                                          |
| #8  | 5'-CGGTCGGCTTGCACCAT-3'                                             |
| #9  | 5'-P-CACATTGGGCACGGACGAGGAAddC-3'                                   |
| #10 | 5'- <u>ctccgccgggtcccc</u> AACAGT <u>GTTGCATCGCGA</u> ACTTCAGCTC-3' |
| #11 | 5'- <u>ctccgccgggtcccc</u> AACAGT <u>TTGAGAGTCGGGTTGAGAC</u> -3'    |
| #12 | 5'-TTCCTCGTCCGTGCCCAATGTG-3'                                        |
| #13 | 5'-CTCCGCCGGGTCCCCAACAGT-3'                                         |
| #14 | 5'- <u>TTTTATCATATGTCCGTATCGAAGTCCAATGC</u> -3'                     |
| #15 | 5'- <u>AAATTACTCGAGGCAGCGGCATGAACGACAAC</u> -3'                     |
| #16 | 5'- <u>TTTTTACATATGTCCGTATCGAAGTCGAATCT</u> -3'                     |
| #17 | 5'- <u>TATTATCTCGAGCCATCGTCCCGAAGCGCATG</u> -3'                     |

The nucleotides noncomplimentary to the sequences of *alpA* and *alpB* are underlined; in the sequences of primers #10 and #11, the nucleotides corresponding to the sequence of vector pUC18-lic are shown by lowercase letters.

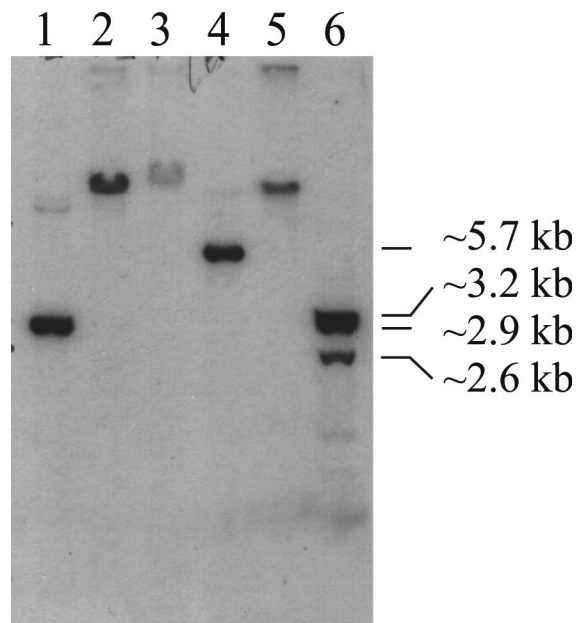

Fig. S1. (Supplemental material) Southern blot hybridization of *Lysobacter* sp. XL1 genomic DNA fragments with DNA probe to endopeptidase L1 gene. Numbers indicate restriction endonucleases *EcoRI* (1), *HindIII* (2), *XbaI* (3), *XhoI* (4), *BamHI* (5) and *SalI* (6).
